# Supplementary material for: Cross-cultural adaptation, reliability, and validity of the Vertigo symptom scale–short form in the central Kurdish dialect
Source: Springer Nature journal article supplement (doi:10.1186/s12955-019-1168-z), 2019-07-17
Supplement: MOESM2 [file 16957706]

دیاریکردنی وهلام بۆ چه ندجاره توشبونی ئەم (۱۵) سکالاینه‌ی خوارهوه و ئەژمارکردنی بهای ئەو وهلامانه به کاردههینرئ وهک پێوهریک بۆ دیاریکردنی رادده‌ی هیژی سکالاکانی سه‌ره‌سوره، بۆ ههر پرسیارنیک ته‌نها پینچ وهلام هه‌یه، و ههر وهلامیکیش به‌هایه‌کی بۆدانراوه به‌م شتیه‌یه؛ (هیچ کات=۰، که‌مجار=۱، هه‌ندجار=۲، زۆرجار=۳، هه‌موکات=۴). نه‌خۆش ده‌بیت نه‌نها یه‌ک وهلام بۆ ههر پرسیارنیک هه‌ل‌بژێرنیت.

هه‌ریه‌ک له‌م ۱۵ سکالایه‌ش پێوه‌ریک به‌رامبه‌ری هه‌یه، تکایه له‌ روانگه‌ی کلتورپی زمانی کوردی ناوه‌نده‌وه (سۆرانی)، به‌ دیاری کردنی نیه‌به‌تی سه‌ددی له‌سه‌ر پێوه‌ره‌کان راو و بۆچونی خۆت دیاری بکه له‌ سه‌ر شینوازی دا‌رشتن و وشه‌کانی ههر سکالایه‌ک، له‌ بواره‌کانی: توندو تۆنی، رۆشنی، زمانه‌وانی و هه‌روه‌ها تیگه‌شتنی زۆریه‌ی خه‌لک له‌ مه‌به‌ستی سکالاکان و وه‌لامه‌کانیان که له‌ سه‌ره‌وه‌ ناماژه‌ی بۆکرا. که‌موکوریته‌ به‌دی‌کرد، تکایه دیاری بکه و شینوازی گونجاو ترمان بۆ بنوسه. له‌ به‌شی سه‌ره‌وه‌ی یه‌که‌م پێوه‌ر چه‌ند مه‌ودایه‌ک بۆ وه‌لامدانه‌وه دیاری کراوه به‌ نیه‌به‌تی سه‌ددی، تکایه سو‌دمه‌ند به‌ له‌و مه‌ودایانه‌ کاتی‌ک نیه‌به‌که دیاری ده‌که‌یت.

Answers of the following (15) symptoms are used as a score to measure the level of impact that produced by vestibular disorders, for each symptom there are five established answers, and each answer has a specific value; ( never=0, a few times=2 several times=3, quite often=3 and very often=4). Patient must select only one answer for each symptom.

Please identify on each scale, your subjective percentage rating for the consistency of the contents of each of the following 15 translated symptoms in regard of meaning, lucidity and cultural understandability. Refer to the identified range of response located above the scales.

Notes: In addition to rating, patients must answer each item by selecting one of the aforementioned values; Members of the focus group must compare translated symptoms with the original one.

| سکالاکان                                                                                                                                                                                                          | باش نی یه<br>که‌متر له‌ ۵۰% | مامناوه‌ند<br>له‌ نیوان ۵۰ - ۷۵% | باش<br>له‌ نیوان ۷۵ - ۹۰% | نایاب<br>زیاتر له‌ ۹۰%        |
|-------------------------------------------------------------------------------------------------------------------------------------------------------------------------------------------------------------------|-----------------------------|----------------------------------|---------------------------|-------------------------------|
| Symptoms                                                                                                                                                                                                          | Poor<br>Less than 50%       | Moderate<br>between<br>50-75%    | Good<br>Between<br>75-90% | Excellent<br>more than<br>90% |
| 1<br>هه‌ستکردن که خۆت یان شته‌کانی ده‌روبه‌رت ده‌سورینه‌وه یان ده‌جولین بۆ ماوه‌ی که‌متر له‌ (۲۰) ده‌ققه<br>A feeling that either you, or things around you, are spinning or moving, lasting less than 20 minutes |                             |                                  |                           |                               |
| 2<br>نۆبه‌ی گه‌رما یان سه‌رما<br>Hot or cold spells                                                                                                                                                               |                             |                                  |                           |                               |
| 3<br>دل تیکه‌هلان، رشانه‌وه<br>Nausea (feeling sick), vomiting                                                                                                                                                    |                             |                                  |                           |                               |
| 4<br>هه‌ستکردن که خۆت یان شته‌کانی ده‌روبه‌رت ده‌سورینه‌وه یان ده‌جولین بۆ ماوه‌ی زیاتر له‌ (۲۰) ده‌ققه<br>A feeling that either you, or things around you, are spinning or moving, lasting more than 20 minutes  |                             |                                  |                           |                               |
| 5<br>دل په‌له‌په‌ل کردن یان دل‌ه‌کوژی<br>Heart pounding or fluttering                                                                                                                                             |                             |                                  |                           |                               |
| 6<br>هه‌ستکردن به‌وه‌ی که‌ گه‌ژێ یان وری یان به‌ سه‌ر عه‌رزوه‌ نیت به‌ درێژایی رۆژ<br>A feeling of being dizzy, disoriented or "swimmy" lasting all day                                                           |                             |                                  |                           |                               |
| 7<br>سه‌رئێشه‌ یان هه‌ستکردن به‌وه‌ی سه‌رت قورسه<br>Headache, or feeling of pressure in the head                                                                                                                  |                             |                                  |                           |                               |
| 8<br>نه‌توانی به‌باشی به‌پێوه‌ بوه‌ستیت یان ری بکه‌یت به‌ بی ده‌ستگرتن یان یارمه‌تی، ره‌تلدان یان به‌لادا‌که‌وتن                                                                                                  |                             |                                  |                           |                               |

|    |                                                                                                                                                                                 |                                                                                    |
|----|---------------------------------------------------------------------------------------------------------------------------------------------------------------------------------|------------------------------------------------------------------------------------|
|    | Unable to stand or walk properly without support, veering or staggering to one side                                                                                             |                                                                                    |
| 9  | هه‌ناسه‌توندى يان هه‌ناسه‌سواری<br>Difficulty breathing, been short of breath                                                                                                   | 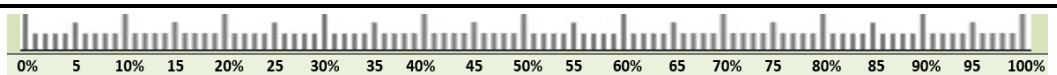 |
| 10 | هه‌ستکردن به ناجیگیری، خه‌ریک بیت ته‌وازن له ده‌ست بده‌یت بۆ ماوه‌ی زیاتر له (٢٠) ده‌ققه<br>Feeling unsteady, about to lose balance, lasting more than 20 minutes               |  |
| 11 | ئاره‌قه‌کردنه‌وه‌ی زۆر<br>Excessive sweating                                                                                                                                    |  |
| 12 | هه‌ستکردن به بی هیژی، خه‌ریک بیت ببورنیتنه‌وه<br>Feeling faint, about to black out                                                                                              |  |
| 13 | هه‌ستکردن به ناجیگیری، خه‌ریک بیت ته‌وازن له ده‌ست بده‌یت بۆ ماوه‌ی که‌متر له (٢٠) ده‌ققه<br>Feeling unsteady, about to lose balance, lasting less than 20 minutes              |  |
| 14 | ئازاری دل یان سنگ<br>Pains in the heart or chest region                                                                                                                         |  |
| 15 | هه‌ستکردن به‌وه‌ی که‌ گه‌ژێ یان وری یان به‌ سه‌ر عه‌رزوه‌ نیت بۆ ماوه‌ی که‌متر له (٢٠) ده‌ققه<br>A feeling of being dizzy disoriented or "swimmy", lasting less than 20 minutes |  |
