# Supplementary material for: Cross-cultural adaptation, reliability, and validity of the Vertigo symptom scale–short form in the central Kurdish dialect
Source: Springer Nature journal article supplement (doi:10.1186/s12955-019-1168-z), 2019-07-17
Supplement: MOESM3 [file 16957706]

| ناوی نهخۆش:                                                                                                                                                                                                                                                                                                  |         | رهگهز:           |         | تهمه ن:                  |                                                                                                                  |
|--------------------------------------------------------------------------------------------------------------------------------------------------------------------------------------------------------------------------------------------------------------------------------------------------------------|---------|------------------|---------|--------------------------|------------------------------------------------------------------------------------------------------------------|
| بهروار:                                                                                                                                                                                                                                                                                                      |         | ID:              |         |                          |                                                                                                                  |
| <b>Vertigo Symptom Scale-Short form-Kurdish-central (VSS-SF-KC)</b>                                                                                                                                                                                                                                          |         |                  |         |                          |                                                                                                                  |
| پێوهری سکالای سه رهخولی- فۆرمی کورت                                                                                                                                                                                                                                                                          |         |                  |         |                          |                                                                                                                  |
| حهز ده که ین بزانی، کامانه نهو سکالیانهی که په یوهندیان به گێژبونهوه هه بووه و ئیوه هه تانبوه له ماوهیه بی پیشودا، تکایه ژمارهی گونجاو دیاری بکه به رامبهه هه سکالیه ک له م لیستهی خواره ودا، بۆ نهوهی ده ربکه ویت که چه ندر جار هه تانبوه له ماوهی مانگی پیشودا، توندی هه ژمارهیه ک له خواره وه دیاری کراوه |         |                  |         |                          |                                                                                                                  |
| . په عنی ههچ کات                                                                                                                                                                                                                                                                                             |         | ۱ په عنی که مچار |         | ۲ په عنی هه ندی جار      |                                                                                                                  |
|                                                                                                                                                                                                                                                                                                              |         | ۳ په عنی زۆر جار |         | ۴ په عنی هه موکات (دایم) |                                                                                                                  |
| <b>سکالا</b>                                                                                                                                                                                                                                                                                                 |         |                  |         |                          |                                                                                                                  |
| دايم                                                                                                                                                                                                                                                                                                         | زۆر جار | هه ندی جار       | که مچار | ههچ کات                  |                                                                                                                  |
| ۴                                                                                                                                                                                                                                                                                                            | ۳       | ۲                | ۱       | ۰                        | ۱ هه سترکردن که خۆت یان شته کانی ده ور بهرت ده سورینه وه یان ده جولین بۆ ماوهی <b>که متر</b> له (۲۰) ده ققه      |
| ۴                                                                                                                                                                                                                                                                                                            | ۳       | ۲                | ۱       | ۰                        | ۲ نۆبهی گه رما یان سه رما (تاوی گه رما یان سه رما)                                                               |
| ۴                                                                                                                                                                                                                                                                                                            | ۳       | ۲                | ۱       | ۰                        | ۳ دل تیکه له لاتن ، رشانه وه                                                                                     |
| ۴                                                                                                                                                                                                                                                                                                            | ۳       | ۲                | ۱       | ۰                        | ۴ هه سترکردن که خۆت یان شته کانی ده ور بهرت ده سورینه وه یان ده جولین بۆ ماوهی <b>زیاتر</b> له (۲۰) ده ققه       |
| ۴                                                                                                                                                                                                                                                                                                            | ۳       | ۲                | ۱       | ۰                        | ۵ دل په له په ل کردن یان دلّه کوئ                                                                                |
| ۴                                                                                                                                                                                                                                                                                                            | ۳       | ۲                | ۱       | ۰                        | ۶ هه سترکردن به وهی که گێژی یان وری (به سه ر عه رزه وه نیت) <b>به درێژایی رۆژ</b>                                |
| ۴                                                                                                                                                                                                                                                                                                            | ۳       | ۲                | ۱       | ۰                        | ۷ سه ر ئیشه یان هه سترکردن به وهی سه رت فوره                                                                     |
| ۴                                                                                                                                                                                                                                                                                                            | ۳       | ۲                | ۱       | ۰                        | ۸ نه توانی به باشی به پێوه بوه ستیت یان ری بکه یت به ین ده ست گرتن یان یارمه تی، ره تلدان یان به لادا که وتن     |
| ۴                                                                                                                                                                                                                                                                                                            | ۳       | ۲                | ۱       | ۰                        | ۹ هه ناسه توندی یان هه ناسه سواری                                                                                |
| ۴                                                                                                                                                                                                                                                                                                            | ۳       | ۲                | ۱       | ۰                        | ۱۰ هه سترکردن به ناچیکیری، خه ریک بی ت هاوسه نگی (ته وازن) له ده ست بده یت بۆ ماوهی <b>زیاتر</b> له (۲۰) ده ققه  |
| ۴                                                                                                                                                                                                                                                                                                            | ۳       | ۲                | ۱       | ۰                        | ۱۱ ئاره قه کردنه وهی زۆر                                                                                         |
| ۴                                                                                                                                                                                                                                                                                                            | ۳       | ۲                | ۱       | ۰                        | ۱۲ هه سترکردن به ین هه یزی ، خه ریک بی ت ببورینه وه                                                              |
| ۴                                                                                                                                                                                                                                                                                                            | ۳       | ۲                | ۱       | ۰                        | ۱۳ هه سترکردن به ناچیکیری، خه ریک بی ت هاوسه نگی (ته وازن) له ده ست بده یت بۆ ماوهی <b>که متر</b> له (۲۰) ده ققه |
| ۴                                                                                                                                                                                                                                                                                                            | ۳       | ۲                | ۱       | ۰                        | ۱۴ ئازاری دل یان سنگ                                                                                             |
| ۴                                                                                                                                                                                                                                                                                                            | ۳       | ۲                | ۱       | ۰                        | ۱۵ هه سترکردن به وهی که گێژی یان وری (به سه ر عه رزه وه نیت) بۆ ماوهی <b>که متر</b> له (۲۰) ده ققه               |
